# Supplementary material for: N4-acetylcytidine regulates the replication and pathogenicity of enterovirus 71
Source: PubMed Central journal article supplement (PMC9458434; doi:10.1093/nar/gkac675), 2022-08-16
Supplement: gkac675_supplemental_file.pdf [file gkac675_supplemental_file.pdf]

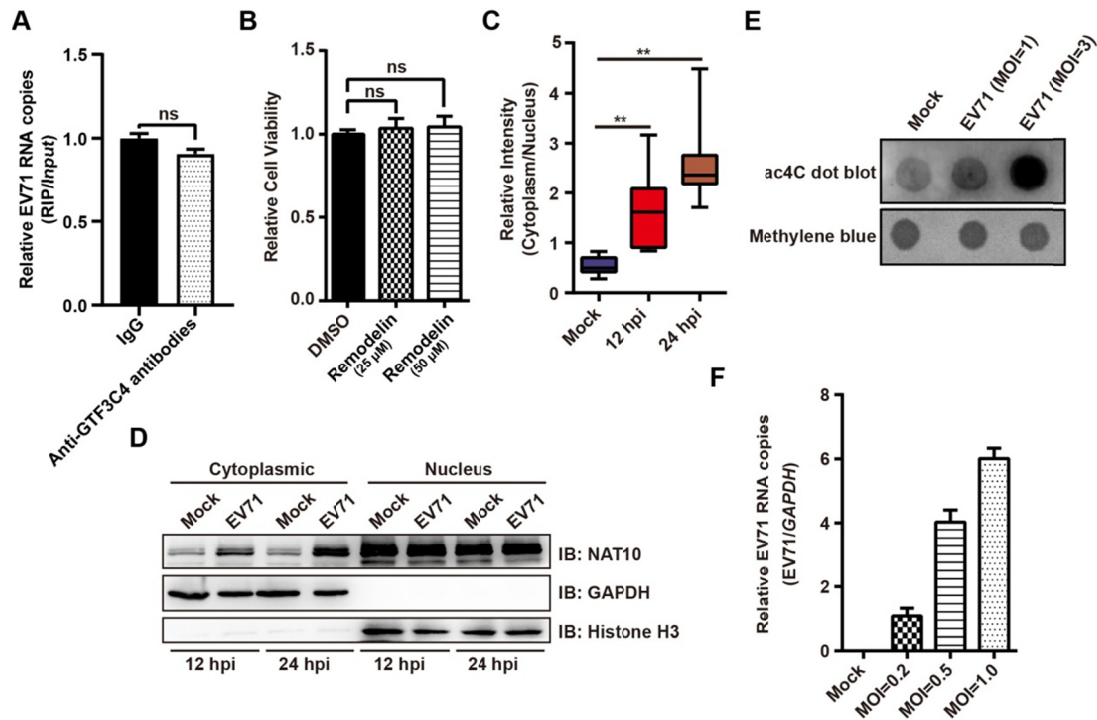

**Figure S1.** EV71 altered the expression pattern of NAT10. **(A)** Binding of GTF3C4 to EV71 RNA. EV71-infected Vero cells were crosslinked using formaldehyde, and IP was performed using anti-GTF3C4 antibodies. The results were quantified using qPCR. IgG was used as a negative control. Data are means  $\pm$  SEMs ( $n = 3$ ). ns, not significant, unpaired Student's *t*-tests. **(B)** DMSO- or remodelin-treated Vero cells were cultured for 1 day and their viability measured by CCK-8 Cell Counting Kit. Data are means  $\pm$  SEMs ( $n = 3$ ). ns, not significant, unpaired Student's *t*-tests. **(C)** Ratio of NAT10 in the cytoplasm to that in the nucleus, as quantified using ImageJ. Data were graphed in box-and-whisker plots, indicating the minimum, first quartile, median, third quartile, and maximum ( $n \geq 10$ ).  $**P \leq 0.01$ , unpaired Student's *t*-tests. **(D)** Localization of NAT10 in the nucleus and cytoplasm of mock- or EV71-infected Vero cells. Nuclear and cytoplasmic fractions were subjected to western blotting using antibodies against NAT10. Histone 3 and GAPDH were used as controls for each fraction. **(E)** Anti-ac4C dot blots for total RNA extracted from EV71-infected cells (MOI = 1 or 3) or mock-infected cells at 12 hpi. Methylene blue staining was used as a loading control. **(F)** RNA expression levels of EV71. Total RNA was extracted at 12 hpi from EV71- (MOI = 0.2, 0.5, or 1) or mock-infected Vero cells and quantified using qRT-PCR. *GAPDH* was used as a control. Data are means  $\pm$  SEMs ( $n = 3$ ).

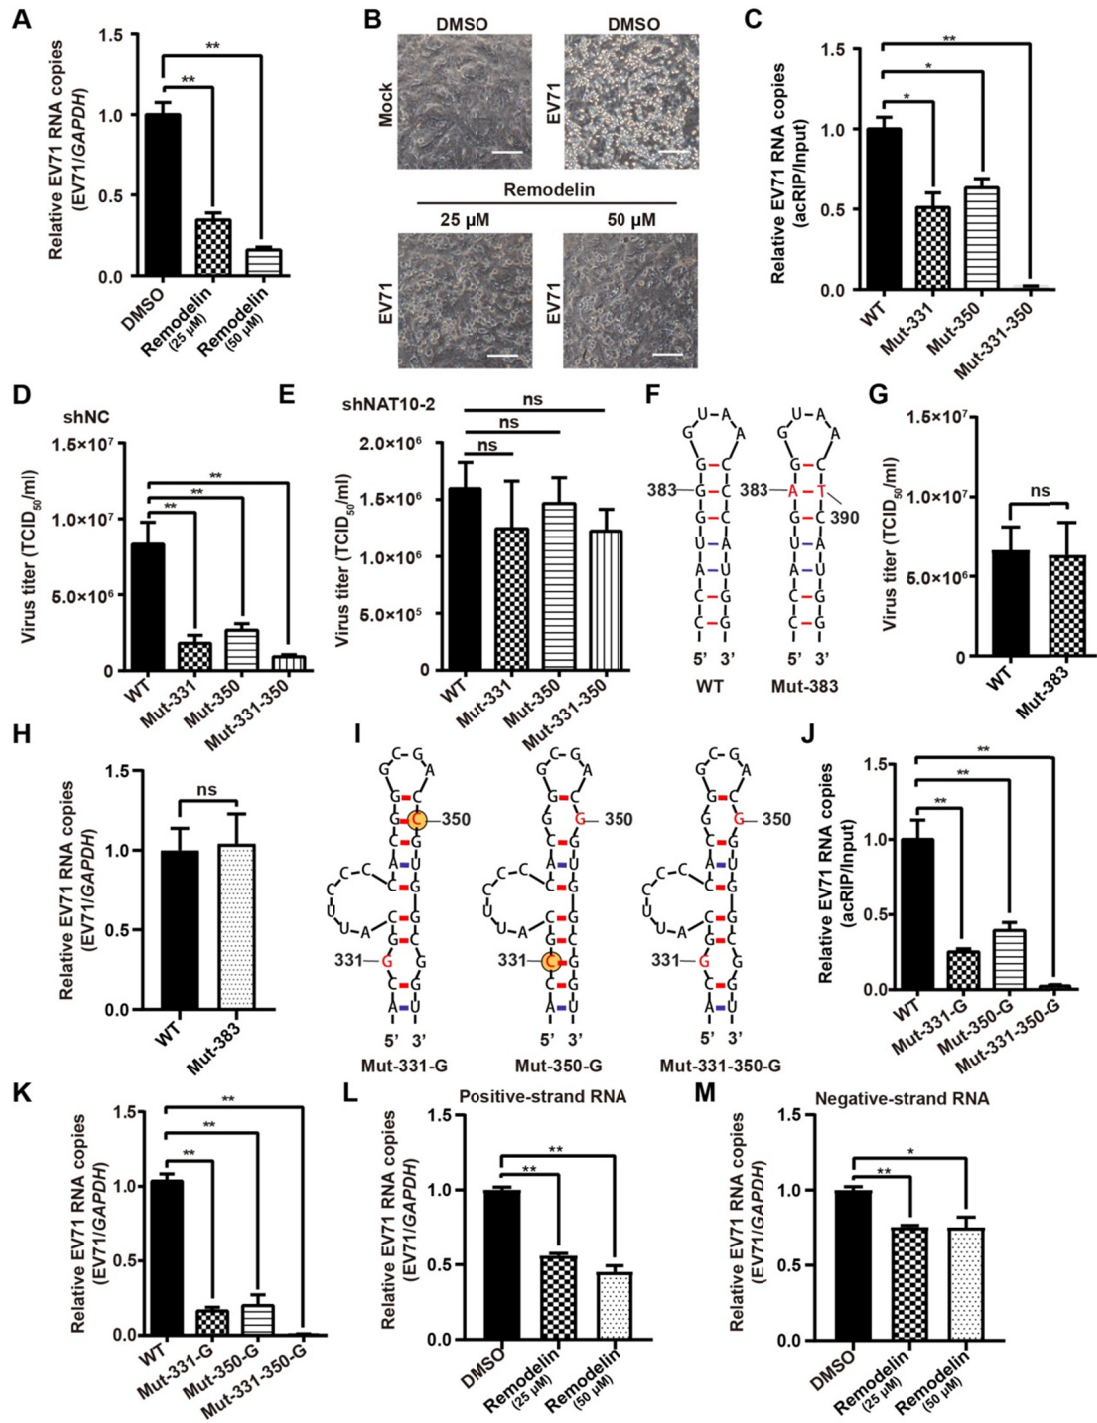

**Figure S2.** ac4C modification regulated EV71 replication. **(A)** qRT-PCR was performed to measure EV71 RNA levels in Vero cells in which NAT10 was inhibited by remodelin at the indicated times post-infection. *GAPDH* was used as a control. Data are means  $\pm$  SEMs ( $n = 3$ ).  $**P \leq 0.01$ , unpaired Student's *t*-tests. **(B)** CPE of mock- or EV71-infected Vero cells with DMSO or remodelin treated at 12 h post-infection. Scale bars, 50  $\mu$ m. **(C)** acRIP-qRT-PCR was performed to check ac4C levels of WT and mutation virus. Total RNAs were extracted from the EV71 WT- or mutants-infected Vero cells and incubated with ac4C-specific antibody, followed by IP and qRT-PCR. Data are means  $\pm$  SEMs ( $n = 3$ ).  $*P \leq 0.05$ ,  $**P \leq 0.01$ , unpaired Student's *t*-tests. **(D & E)** Viral titers (TCID<sub>50</sub>/mL). The supernatants of EV71 WT- or ac4C

mutant-infected Vero cells, treated with shNC (D) or shNAT10 (E), were collected at 24 hpi, and EV71 titers were measured as the TCID<sub>50</sub>. Data are means ± SDs ( $n = 3$ ). \*\* $P \leq 0.01$ , ns: not significant, unpaired Student's  $t$ -tests. (F) Schematics of EV71 WT and Mut-383. The RNA secondary structure was predicted by Mfold software. (G) Viral titers (TCID<sub>50</sub>/mL). The supernatants of EV71 WT- and Mut-383-infected Vero cells were collected at 24 hpi, and EV71 titers were measured as the TCID<sub>50</sub>. Data are means ± SDs ( $n = 3$ ). ns: not significant, unpaired Student's  $t$ -tests. (H) qRT-PCR was performed to determine the RNA levels of EV71 WT or Mut-383 in Vero cells at 24 h post-transfection, with *GAPDH* used as a control. Data are means ± SEMs ( $n = 3$ ). ns: not significant, unpaired Student's  $t$ -tests. (I) Schematics of the location of ac4C sites in EV71 WT and C-G mutations. The RNA secondary structure was predicted by Mfold software. Yellow solid circles indicate ac4C modification. (J) ac4C levels of EV71 WT and mutations in EV71 RNA-transfected cells were determined by acRIP-qRT-PCR. Data are means ± SEMs ( $n = 3$ ). \*\* $P \leq 0.01$ , unpaired Student's  $t$ -tests. (K) qRT-PCR was performed to determine the RNA levels of EV71 WT or ac4C mutants in Vero cells at 24 h post-transfection, with *GAPDH* used as a control. Data are means ± SEMs ( $n = 3$ ). \*\* $P \leq 0.01$ , unpaired Student's  $t$ -tests. (L & M) qRT-PCR was performed to determine the positive-strand (L) and negative-strand (M) RNA levels of EV71 in Vero cells, treated with DMSO or remodelin at 24 hpi, with *GAPDH* used as a control. Data are means ± SEMs ( $n = 3$ ). \* $P \leq 0.05$ , \*\* $P \leq 0.01$ , unpaired Student's  $t$ -tests.

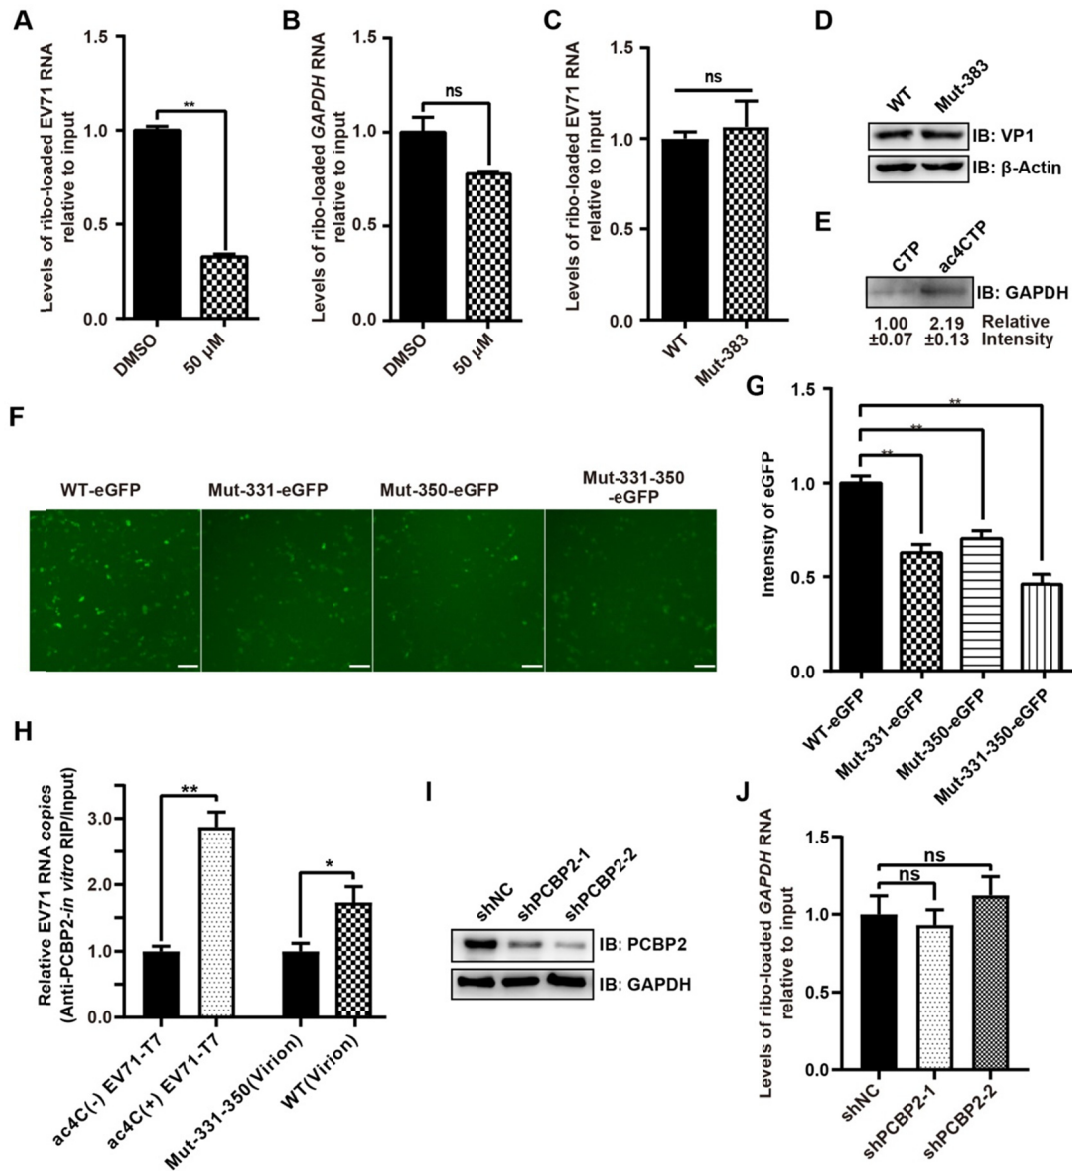

**Figure S3.** ac4C promoted the translation of EV71 RNA. (**A & B**) DMSO- or remodelin-treated Vero cells were infected by EV71 and used to analyze both the input and ribosome loaded RNA levels of EV71 (A) and GAPDH (B) at 24 h postinfection. Data are means  $\pm$  SEMs ( $n = 3$ ). \*\* $P \leq 0.01$ , ns, not significant, unpaired Student's  $t$ -tests. (**C**) EV71 WT- or Mut-383-infected Vero cells were used to analyze the input RNA and ribosome-loaded RNA levels of EV71 at 24 h postinfection. Data are means  $\pm$  SEMs ( $n = 3$ ). ns, not significant, unpaired Student's  $t$ -tests. (**D**) Western blot analysis of extracts of EV71 WT- or Mut383-infected Vero cells. GAPDH was used as a loading control. (**E**) *In vitro* translation assays were performed using ac4C( $\pm$ ) GAPDH mRNA template. (**F**) eGFP expression in RD cells transfected with WT or ac4C mutants (harboring the eGFP reporter vector) at 24 h post-transfection. Scale bars, 50  $\mu$ m. (**G**) Fluorescence intensity of eGFP in RD cells transfected with WT or ac4C mutants eGFP reporter Vectors at 24 h post-transfection was quantified using ImageJ. Data are means  $\pm$  SEMs ( $n = 3$ ). \*\* $P \leq 0.01$ , unpaired Student's  $t$ -tests. (**H**) Binding of PCBP2 and EV71 RNA *in vitro*. EV71 RNAs extracted from T7 transcripts (ac4C[ $\pm$ ]) or WT and ac4C mutant virions were incubated with GST-PCBP2. The samples were subjected to IP, followed by quantification

using qRT-PCR. Data are means  $\pm$  SEMs ( $n = 3$ ).  $*P \leq 0.05$ ,  $**P \leq 0.01$ , unpaired Student's  $t$ -tests. **(I)** Western blotting of extracts from EV71-infected Vero cells treated with shNC or shPCBP2. The expression of PCBP2 was assessed using anti-PCBP2 antibodies, and GAPDH served as a loading control. **(J)** shNC- or shPCBP2-treated Vero cells were infected with EV71 and used to analyze the input RNA and ribosome-loaded RNA levels of *GAPDH* at 24 hpi. Data are means  $\pm$  SEMs ( $n = 3$ ). ns, not significant, unpaired Student's  $t$ -tests.

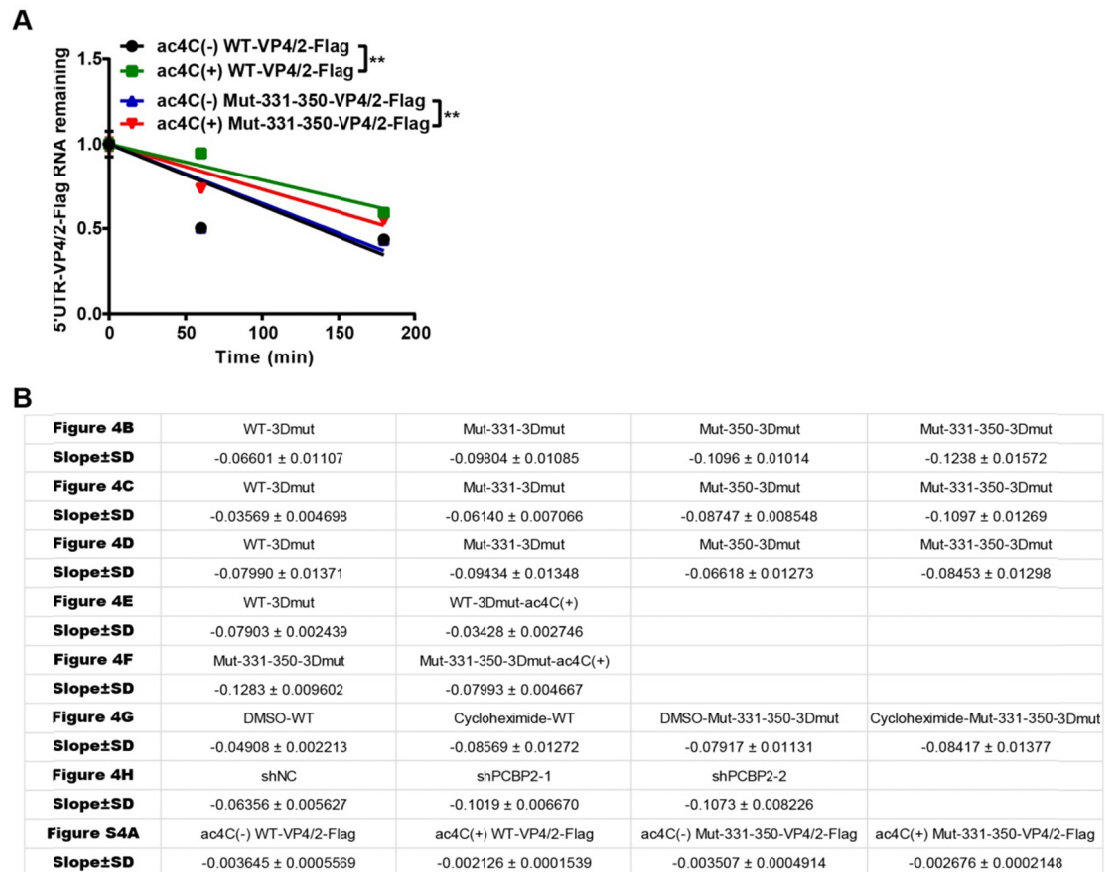

**Figure S4.** ac4C enhanced the stability of EV71 RNA. **(A)** qRT-PCR was performed to measure the RNA levels of ac4C( $\pm$ ) WT- or Mut-331-350-VP4/2-Flag RNA. Decay graphs were generated by applying linear regression analysis. Data are means  $\pm$  SEMs ( $n = 3$ ).  $**P \leq 0.01$ , two-way ANOVA. **(B)** The slopes of all degradation curves are shown. Data are mean slopes  $\pm$  SDs.

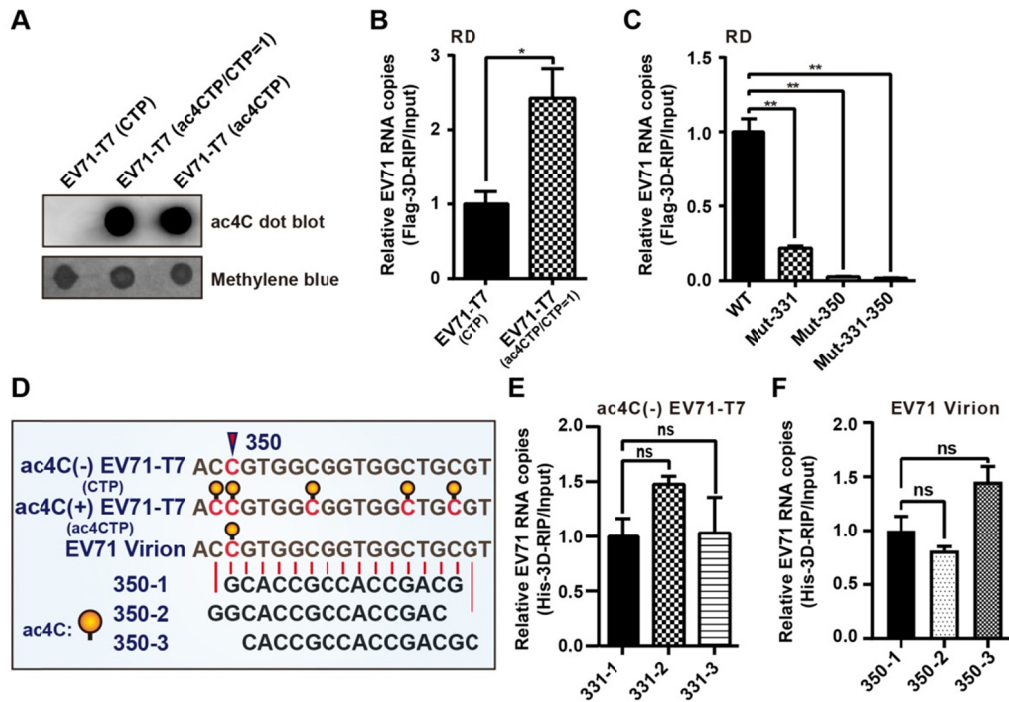

**Figure S5.** ac4C enhanced the combination of 3D and EV71 RNA. **(A)** Anti-ac4C dot blot was performed on EV71 genome transcribed by T7 with (ac4CTP/CTP=1 and ac4CTP) or without (CTP) ac4C added, with methylene blue staining as loading control. **(B & C)** Binding of 3D to EV71 RNA with different ac4C levels in RD cells. Flag-3D overexpressed RD cells were transfected by EV71 genomes with (ac4C/C=50%) or without (ac4C/C=0) ac4C **(B)** or infected by EV71 WT and ac4C mutants **(C)**, followed by crosslinked-RIP with Flag antibodies and quantified by qRT-PCR. Data are means  $\pm$  SEMs ( $n = 3$ ). \* $P \leq 0.05$ , \*\* $P \leq 0.01$ , unpaired Student's  $t$ -tests. **(D)** Schematic of EV71 RNA pairing with primers near position 350. Yellow solid circles indicate ac4C modification. **(E & F)** The 3D binding levels of different 331 primers annealed with ac4C(-) EV71-T7 **(E)** and that of different 350 primers annealed with EV71 virion RNA **(F)**. Data are means  $\pm$  SEMs ( $n = 3$ ). ns, not significant, unpaired Student's  $t$ -tests.



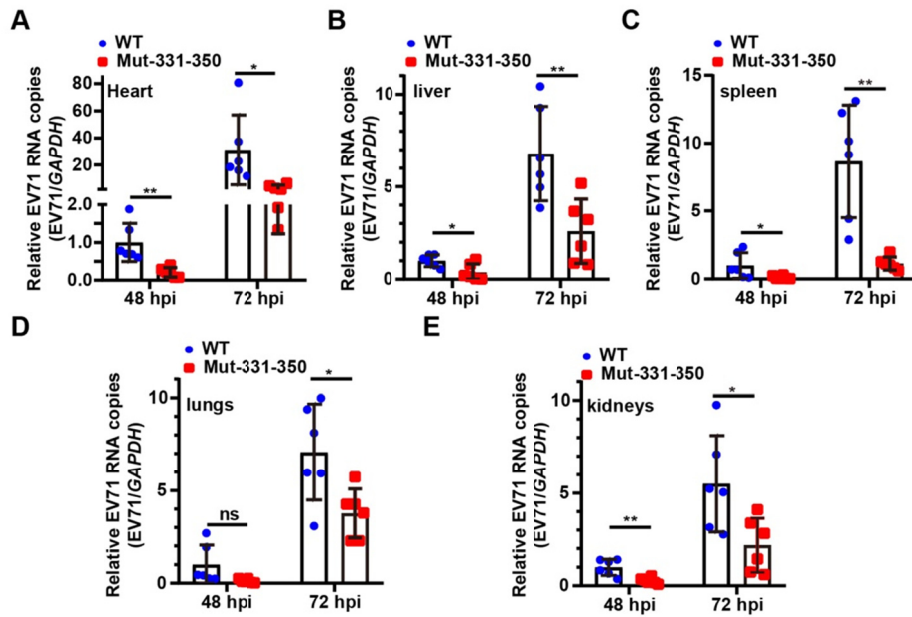

**Figure S6.** EV71 ac4C mutant caused reduced pathogenicity in mice. (A - E) Viral RNA in organs, including heart (A), liver (B), spleen (C), lungs (D) and kidneys (E), from AG6 mice infected with EV71 were quantified by qPCR. Data are means  $\pm$  SEMs ( $n = 6$ ). \* $P \leq 0.05$ , \*\* $P \leq 0.01$ , ns: not significant, unpaired Student's  $t$ -tests.

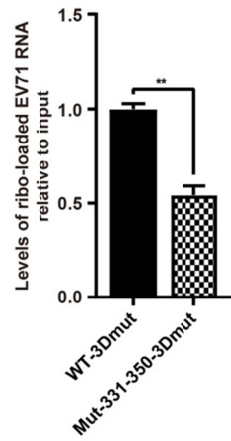

**Figure S7.** The effect of ac4C on EV71 translation was independent of 3D. WT-3Dmut- or Mut-331-350-3Dmut-transfected-Vero cells were used to analyze the input RNA and ribosome loaded RNA levels of EV71 at 8 h post transfection. Data are means  $\pm$  SEMs ( $n = 3$ ).  $**P \leq 0.01$ , unpaired Student's  $t$ -tests.
